# Supplementary material
Source: PubMed Central journal article supplement (PMC7025879)

# Supplemental Information

Extended data 5c

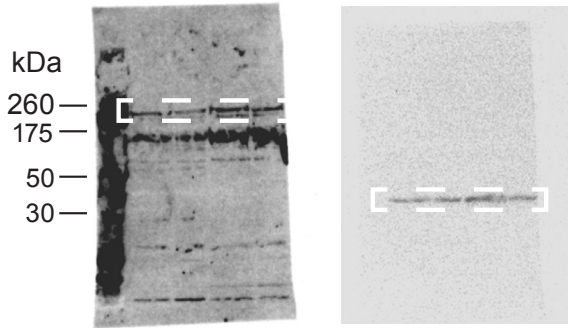

Extended data 7e

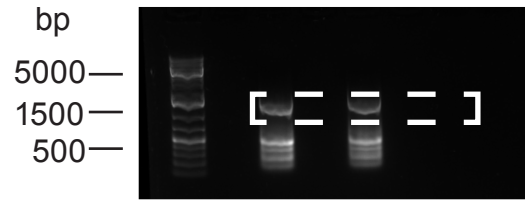

Extended data 8c

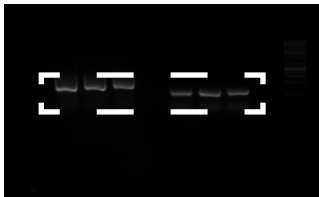

Extended data 8d

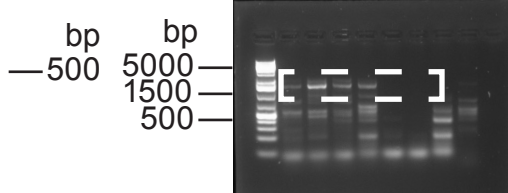

Extended data 8g

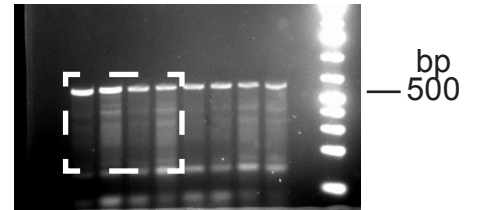

Extended data 8i

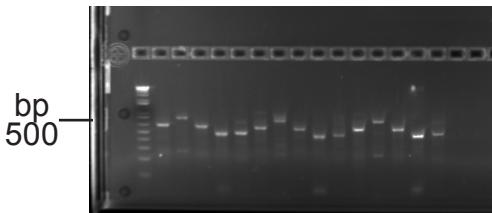

Extended data 10c

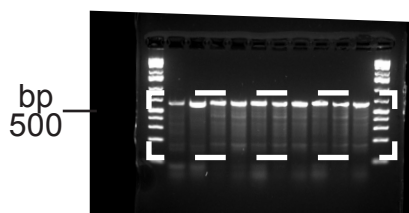

Supplemental information 2c

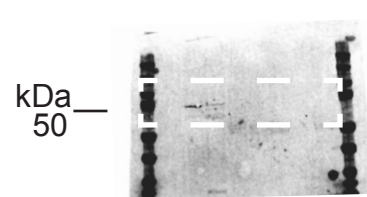

Supplemental information 2c

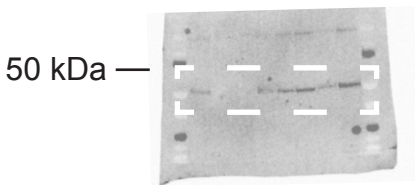

Supplemental information 2c

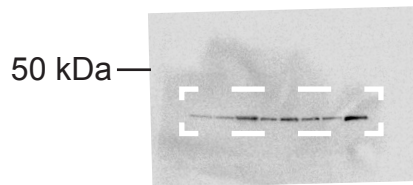

Supplemental information 2f

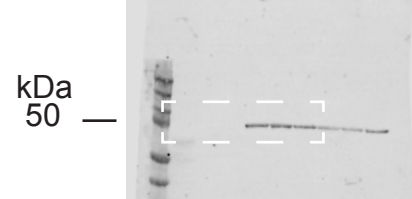

Supplemental information 2f

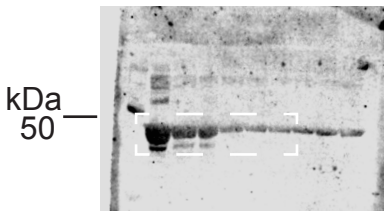

Supplemental information 8n, 10g

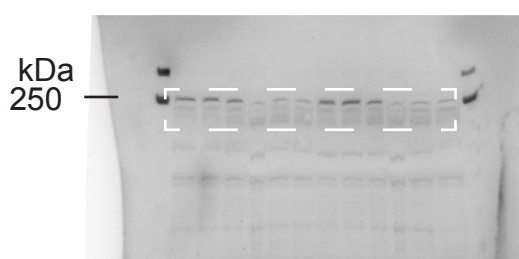

Supplemental information 8n, 10g

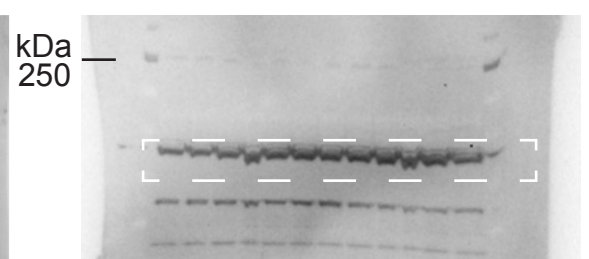

Supplement: EMS83737-supplement-Supplemental_information.pdf [file EMS83737-supplement-Supplemental_information.pdf]
