# Supplementary material
Source: PubMed Central journal article supplement (PMC7025879)
Supplement: EMS83737-supplement-Supplementary_tables_and_notes.pdf [file EMS83737-supplement-Supplementary_tables_and_notes.pdf]

**Supplemental Table 1: Table of Antibodies**

| <b>Antibody</b>                         | <b>Dilution</b>           | <b>Provider</b>  | <b>Product Number</b> |
|-----------------------------------------|---------------------------|------------------|-----------------------|
| Rabbit $\alpha$ Olig2                   | IHC: 1:1000               | Millipore        | ab9610                |
| Rabbit $\alpha$ Ng2                     | IHC: 1:100                | Millipore        | MAB5384               |
| Rat $\alpha$ MBP                        | IHC: 1:100                | AbD Serotec      | MCA409S               |
| Rabbit $\alpha$ Lmnb1                   | IHC: 1:1000 WB:<br>1:5000 | Abcam            | ab16048               |
| Rabbit $\alpha$ Pdgfra                  | IHC: 1:500 FC: 1:500      | Cell Signalling  | 3174                  |
| Goat $\alpha$ Lmna/c                    | IHC: 1:100<br>WB:1:7500   | Santa Cruz       | sc-20681              |
| Mouse $\alpha$ Actin                    | WB: 1:20000               | Sigma            | 556321                |
| Mouse $\alpha$ CC1                      | IHC: 1:300                | Millipore        | MABC200               |
| Goat $\alpha$ Sox10                     | IHC: 1:100                | Santa Cruz       | sc-17342              |
| Rabbit $\alpha$ Piezo1                  | IHC: 1:100<br>WB:1:500    | Proteintech      | 15939-1-AP            |
| Rabbit $\alpha$ Ha-Tag                  | IHC: 1:500                | Cell Signalling  | #3724                 |
| Mouse $\alpha$ Anti-Chondroitin Sulfate | IHC: 1:100                | Sigma            | C8035                 |
| Chicken $\alpha$ GFP                    | IHC: 1:300                | Abcam            | ab13970               |
| Alexa Fluor 594 Goat $\alpha$ Mouse IgM | IHC: 1:500                | Thermo Fisher    | A-21044               |
| Alexa Fluor 488 Donkey $\alpha$ Rabbit  | IHC: 1:500                | Millipore        | A21206                |
| Alexa Fluor 594 Donkey $\alpha$ Rabbit  | IHC: 1:400                | Molecular Probes | A21207                |
| Alexa Fluor 594 Donkey $\alpha$ Goat    | IHC: 1:500                | Thermo Fisher    | A-11058               |
| Alexa Fluor 647 Donkey $\alpha$ Mouse   | IHC: 1:500                | Thermo Fisher    | A-31571               |
| IRDye800CW D anti-Goat                  | WB: 1:10000               | Li-Cor           | 926_32214             |
| IRDye800CW D anti-Mouse                 | WB: 1:10000               | Li-Cor           | 926_32212             |
| IRDye600CW D anti-Rabbit                | WB: 1:10000               | Li-Cor           | 926_38073             |
| Goat $\alpha$ Olig2                     | IHC: 1:400 FC: 1:500      | R & D            | AF2418                |

**Supplemental Table 2: Table of small molecules**

| <b>Small Molecule</b> | <b>Concentration</b> | <b>Provider</b> | <b>Product Number</b> |
|-----------------------|----------------------|-----------------|-----------------------|
| Y-27632               | 10-50 $\mu$ M        | Sigma           | Y0503                 |
| blebbistatin          | 5 $\mu$ M            | Sigma           | B0560                 |
| Bapta-AM              | 5 $\mu$ M            | Sigma           | A1076                 |

**Supplemental Table 3: Table of Primers**

| Gene                          | Purpose                  | Forward                                                                                                                        | Reverse                                                                                                              | Provider                                       |
|-------------------------------|--------------------------|--------------------------------------------------------------------------------------------------------------------------------|----------------------------------------------------------------------------------------------------------------------|------------------------------------------------|
| <i>LMNB1</i>                  | qPCR                     | 5'-<br>cagattgagtatgagtacaagc –<br>3'                                                                                          | 5'-<br>agtggaagtgttcatctctg –<br>3'                                                                                  | Sigma                                          |
| <i>LMNA</i>                   | qPCR                     | 5' –<br>ctacagcaaacactaaggaac –<br>3'                                                                                          | 5'- ttttcgggatggaacaac -3'                                                                                           | Sigma                                          |
| <i>TBP</i>                    | qPCR                     | 5'- catcatgagaataagagagcc<br>–<br>3'                                                                                           | 5' –<br>ggattgttcttcactttgg –<br>3'                                                                                  | Sigma                                          |
| <i>LMNB1</i>                  | cDNA<br>Amplification    | 5'-<br>taatacgcactcactatagggtacct<br>tcggt-3'                                                                                  | 5'-<br>gaagatcgaccatgtcttgacaagt-<br>3'                                                                              | Sigma                                          |
| <i>LMNA</i>                   | cDNA<br>Amplification    | 5'-<br>taatacgcactcactatagggccga<br>ggtgcgccagcgcc -3'                                                                         | 5'-<br>tggcattccaaaacactttaatgaaa<br>gactttggcatggaggc-3'                                                            | Sigma                                          |
| Minicircle<br>Backbone        | Minicircle<br>Production | 5'-<br>ggcccccccaactgggtaacct<br>ttga-3'                                                                                       | 5'-<br>gaatcatgggaaataggccctccgccg<br>agtgaagtcagcatgagggcgcgcc<br>ccggggagcccaa-3'                                  | Sigma.<br>Plasmid<br>from<br>addgene<br>#87114 |
| U6                            | Minicircle               | 5'-<br>gagggcctatttcccatgattcc-<br>3'                                                                                          | 5'-<br>ccggtgttctcctttcc<br>-3'                                                                                      | Sigma.<br>Plasmid<br>from<br>addgene<br>#48138 |
| <i>shPiezo1<br/>Construct</i> | Minicircle               | 5'-<br>tggaaaggacgaaacaccggtgg<br>atgtgtgtggaagacattcaagag<br>atgtctccacacacatccattttt<br>ctagaggtaccggggcccggtcg<br>ac<br>-3' | 5'-<br>aactagtcaataatcaatgcggaact<br>ccatataaggctatgaactaatgacc<br>cgtaattgattactattaataactagtc<br>gaccgggccccgta-3' | Sigma                                          |
| <i>shControl</i>              | Minicircle               | 5'-<br>gtggaaaggacgaaacaccggca<br>acaagatgaagagaccaactcg<br>agttggctcttcatcttgtttt<br>tctagaggtaccggggcccggtc<br>gac-3'        | same as above                                                                                                        | Sigma                                          |

|                                       |                |                                                                               |                                                                                             |                                                |
|---------------------------------------|----------------|-------------------------------------------------------------------------------|---------------------------------------------------------------------------------------------|------------------------------------------------|
| CMV                                   | Minicircle     | 5'-<br>gacattgattattgactagttatta<br>atagtaatcaattacggggtcatta<br>gttca<br>-3' | 5'-<br>ggggaacagctcctcgccttctcacc<br>atggtggcgtagcctgcttatatagac<br>ctcccaccgtacacgc<br>-3' | Sigma.<br>Plasmid<br>from<br>addgene<br>#48138 |
| GFP PolyA                             | Minicircle     | 5'-<br>atggtgagcaaggcgaggagct<br>gtt<br>-3'                                   | 5'-<br>gttaccagctggggcgccctccc<br>agcatgctgctattcttccaatc<br>-3'                            | Sigma.<br>Plasmid<br>from<br>addgene<br>#48138 |
| Gfp                                   | qPCR           | 5'-<br>aagctgaccctgaagttcatctgc<br>-3'                                        | 5'-ctttagttgcccgtccttgaa -<br>3'                                                            | Sigma                                          |
| Cas9                                  | qPCR           | 5'-aacagcagattgcctgga-<br>3'                                                  | 5'-tcatccgctcgatgaagctc-3'                                                                  | Sigma                                          |
| Cspg4 Promoter                        | Cloning        | 5'-<br>cctgaagctgtagtaggagc-3'                                                | 5'-cggtaccttctcgaactcc -3'                                                                  | Sigma                                          |
| Piezo1 Locus                          | Surveyor Assay | 5'-acacagaccagacgctgct-<br>3'                                                 | 5'-<br>atactggaaaagactccgacacact-<br>3'                                                     | Sigma                                          |
| GFP-Pdgfra PCR                        | Positional PCR | 5'-<br>aagctgaccctgaagttcatctgc-<br>3'                                        | 5'-<br>aatgctggagttgctgcagtacaag-<br>3'                                                     | Sigma                                          |
| Off-target site 1                     | Surveyor Assay | 5'-<br>catcagatcttggaaagt<br>-3'                                              | 5'-<br>ccactgtgagatcaaacc<br>-3'                                                            | Sigma                                          |
| Off-target site 2                     | Surveyor Assay | 5'-<br>cagaagggttaattgaag<br>-3'                                              | 5'-<br>atatgctttgtagtacaggag<br>-3'                                                         | Sigma                                          |
| Off-target site 3                     | Surveyor Assay | 5'-<br>gcactttactgacttagctatc<br>-3'                                          | 5'-<br>gcagtacagagaagttattgac<br>-3'                                                        | Sigma                                          |
| Off-target site 4                     | Surveyor Assay | 5'-<br>cgtaagactattggaatgctc<br>-3'                                           | 5'-<br>catatagaacctttaggatg<br>-3'                                                          | Sigma                                          |
| Off-target site 5                     | Surveyor Assay | 5'-<br>agagtgctactagctttaga<br>-3'                                            | 5'-<br>tgtgtcaagagtaaactcagat<br>-3'                                                        | Sigma                                          |
| Piezo1 mRNA for <i>in vivo</i> crispr | qpcr           | 5'-ctggtcaccggcatctacgtca<br>-3'                                              | 5'-<br>gaagaggaacatgtagacgatttcta<br>gaccacc -3'                                            | sigma                                          |
| gRNA reverse transcription            | gRNA qPCR      | 5'- aagcaccgactcgggtccac-<br>3'                                               | N/A                                                                                         | Sigma                                          |

**Supplemental Table 4: Gene fragments**

| Description               | Sequence                                                                                                                                                                                                                                                                                                                                                                                                                                                                                                                 | Supplier |
|---------------------------|--------------------------------------------------------------------------------------------------------------------------------------------------------------------------------------------------------------------------------------------------------------------------------------------------------------------------------------------------------------------------------------------------------------------------------------------------------------------------------------------------------------------------|----------|
| U6, Pdgfra                | <p>tgtacaaaaagcaggctttaaggaaccaattcagtcgactggatccggtaccaaggtcgggcaggaagagggcctatttccatgattccttcata<br/>           ttgcatatacgatacaaggctgttagagagataattagaattaattgactgtaaacacaaagatattagtacaaaatcgtgacgtagaaagtaata<br/>           atttctgggtagttgcagtttaaaattatgttttaaatggactatcatatgcttaccgtaactgaaagtattcgatttctggcttatatacttgtg<br/>           gaaaggacgaaacaccgcatctgaactcacagtggttttagagctagaatagcaagttaaaaaaggctagtcggtatcaactgaaaaagtg<br/>           gcaccgagtcggtgctttttctagaccagcttctgtgtaaaagtggcggttaaac</p> | ID<br>T  |
| Ribozyme, non-Target gRNA | <p>gcgccgcaaagggttttcttctgagaaattctcaggtttgcttttaaaaaaaagcaaaagacgctgggtggcactcctggttccaggac<br/>           ggggttcaagtcctgcggtgtcttctgctgaattcaaactcgtgatgagtcctgaggacgaaacgagtaagctcgtctgtattactgatattggtggg<br/>           gtttagagctagaaatagcaagttaaaataaggctagtcggtatcaactgaaaaagtgaccgagtcggtgcttttgcggcatggtcccagcct<br/>           cctcgtggcggcggctgggcaacatgctcggcatggcgaatgggacgaataaaaagatctttatttccattagatctgtgtgtggtttttgtgtccgc<br/>           cactgtgagttcagatcgc</p>                                     | ID<br>T  |
| Ribozyme, Piezo1 gRNA     | <p>gcgccgcaaagggttttcttctgagaaattctcaggtttgcttttaaaaaaaagcaaaagacgctgggtggcactcctggttccaggac<br/>           ggggttcaagtcctgcggtgtcttctgctgaattcaaactcgtgatgagtcctgaggacgaaacgagtaagctcgtctcgtattttagaccaccagg<br/>           gtttagagctagaaatagcaagttaaaataaggctagtcggtatcaactgaaaaagtgaccgagtcggtgctttttgcccggcatggtcccagc<br/>           ctctcgtggcggcggctgggcaacatgctcggcatggcgaatgggacgaataaaaagatctttatttccattagatctgtgtgtggtttttgtgtgcc<br/>           gccactgtgagttcagatcgcz</p>                                  | ID<br>T  |
| Nested CRISPR System      | <p>tacaaagtggcggttaaacccgcaactgtgagttcagatcgcaattcaaactcgtgatgagtcctgaggacgaaacgagtaagctcgtctcgtttt<br/>           gtagaccaccagggttttagagctagaaatagcaagttaaaataaggctagtcggtatcaactgaaaaagtgaccgagtcggtgctttttgccc<br/>           ggcatggtcccagcctctcgtggcggcggctgggcaacatgctcggcatggcgaatgggacgaataaaaagatctttatttccattagatctgtgtgt<br/>           tggttttgtgtcgatttttagaccaccaggcgg</p>                                                                                                                                 | ID<br>T  |

Supplemental Table 5: Figure 1

|                                  |                                           |                                        |             |
|----------------------------------|-------------------------------------------|----------------------------------------|-------------|
| <b>GFP+,EdU+/Olig2</b>           | <b>Neonate to Neonate Transplantation</b> | <b>Aged to Neonate Transplantation</b> |             |
| Animal 1                         | 0.222222222                               | 0.152380952                            |             |
| Animal 2                         | 0.141104294                               | 0.135135135                            |             |
| Animal 3                         | 0.122641509                               | 0.157407407                            |             |
| Animal 4                         | 0.134920635                               | 0.152866242                            |             |
| <b>GFP+,EdU+/Olig2</b>           | <b>Neonate to Neonate Transplantation</b> | <b>Aged to Neonate Transplantation</b> |             |
| Animal 1                         | 0.182692308                               | 0.207920792                            |             |
| Animal 2                         | 0.190839695                               | 0.207207207                            |             |
| Animal 3                         | 0.166666667                               | 0.192771084                            |             |
| Animal 4                         | 0.193133491                               | 0.213211085                            |             |
| <b>EdU+Olig2+/mm<sup>2</sup></b> | <b>+Pencillinase</b>                      | <b>+chABC</b>                          |             |
| Animal 1                         | 3.16                                      | 33                                     |             |
| Animal 2                         | 15.77                                     | 29                                     |             |
| Animal 3                         | 6.71                                      | 49                                     |             |
| Animal 4                         | 14                                        | 36                                     |             |
| <b>CC1+Olig2+/mm<sup>2</sup></b> | <b>+Pencillinase</b>                      | <b>+chABC</b>                          |             |
| Animal 1                         | 28.479                                    | 130.4                                  |             |
| Animal 2                         | 51.26                                     | 128.85                                 |             |
| Animal 3                         | 31.87                                     | 180                                    |             |
| Animal 4                         | 44.51                                     | 72.17                                  |             |
| <b>Stiffness (Pa)</b>            | <b>Neonate</b>                            | <b>Young Adult</b>                     | <b>Aged</b> |
| Animal 1                         | 272.1431628                               | 364.0049495                            | 443.3943284 |
| Animal 2                         | 229.3041935                               | 375.464321                             | 482.7785185 |
| Animal 3                         | 243.3769333                               | 367.8861731                            | 488.7230769 |

**Supplemental Table 6: Figure 2**

| <b>EdU+/Olig2+</b> | <b>shControl</b> | <b>shPiezo1</b> |
|--------------------|------------------|-----------------|
| <b>Animal 1</b>    | 0.019607843      | 0.144230769     |
| <b>Animal 2</b>    | 0.027522936      | 0.223300971     |
| <b>Animal 3</b>    | 0.03960396       | 0.130841121     |

|                                       | <b>Neonate</b> |             |             |             | <b>Adult</b> |             |             | <b>Aged</b> |             |  |
|---------------------------------------|----------------|-------------|-------------|-------------|--------------|-------------|-------------|-------------|-------------|--|
| <b>OPC,<br/>Olig2+CC1-<br/>Oligo,</b> | 0.642857143    | 0.774193548 | 0.717391304 | 0.677419355 | 0.571428571  | 0.782608696 | 0.838709677 | 0.766666667 | 0.733333333 |  |
| <b>Olig2+CC1+</b>                     | 0.75           | 0.857142857 | 0.866666667 | 0.053763441 | 0.2          | 0.196428571 | 0.04109589  | 0.028169014 | 0.131147541 |  |

**Supplemental Table 7: Figure 4**

| <b>EdU+GFP+/Olig2+</b> | <b>NT Control</b> | <b>Piezo1 Knockout</b> |
|------------------------|-------------------|------------------------|
| <b>Animal 1</b>        | 0.106382979       | 0.402877698            |
| <b>Animal 2</b>        | 0.095890411       | 0.30625                |
| <b>Animal 3</b>        | 0.209459459       | 0.285714286            |

  

| <b>Oig2+CC1+/mm<sup>2</sup></b> | <b>NT Control</b> | <b>Piezo1 Knockout</b> |
|---------------------------------|-------------------|------------------------|
| <b>Animal 1</b>                 | 72.91608392       | 117.3287645            |
| <b>Animal 2</b>                 | 63.213            | 129.602845             |
| <b>Animal 3</b>                 | 55.94405594       | 118.5499632            |

  

| <b>EdU+/Pdgfra+</b> | <b>NT Control</b> | <b>Piezo1 Knockout</b> |
|---------------------|-------------------|------------------------|
| <b>Animal 1</b>     | 0.009174312       | 0.047619048            |
| <b>Animal 2</b>     | 0.014814815       | 0.044334975            |
| <b>Animal 3</b>     | 0.009174312       | 0.048611111            |

**Supplemental Table 8: Extended Data 4**

|                         | <b>cortex-bleb</b>         | <b>cortex-DMSO</b>                            |
|-------------------------|----------------------------|-----------------------------------------------|
| <b>Max</b>              | 1050.4                     | 752.68                                        |
| <b>Min</b>              | 76.877                     | 93.99                                         |
| <b>Median</b>           | 278.68                     | 335.265                                       |
| <b>Mean</b>             | 284.8131439                | 339.7734862                                   |
| <b>Lower Quartile</b>   | 194.4225                   | 245.87                                        |
| <b>Upper Quartile</b>   | 353.8025                   | 426.42                                        |
| <b>EdU+/Olig2+,CC1-</b> |                            |                                               |
| <b>Animal 1</b>         | <b>DMSO</b><br>0.052631579 | <b>+5<math>\mu</math>M Bleb</b><br>0.06779661 |
| <b>Animal 2</b>         | 0                          | 0.058823529                                   |
| <b>Animal 3</b>         | 0                          | 0.1                                           |
| <b>CC1+Olig2+/mm2</b>   |                            |                                               |
| <b>Animal 1</b>         | <b>DMSO</b><br>192.3076923 | <b>+5<math>\mu</math>M Bleb</b><br>431.372549 |
| <b>Animal 2</b>         | 57.3172381                 | 233.7541846                                   |
| <b>Animal 3</b>         | 163.56                     | 320.6509003                                   |

Supplemental Table 9: Extended data 8

| Cerebellum  |             | Corpus Callosum |             | Grey Matter |             |
|-------------|-------------|-----------------|-------------|-------------|-------------|
| GFP+/Olig2+ | Olig2-/GFP+ | GFP+/Olig2+     | Olig2-/GFP+ | GFP+/Olig2+ | Olig2-/GFP+ |
| 0.358108108 | 0.037735849 | 0.484042553     | 0.010989011 | 0.307291667 | 0           |
| 0.338582677 | 0.093023256 | 0.563876652     | 0           | 0.276785714 | 0.129032258 |
| 0.253623188 | 0.114285714 | 0.537931034     | 0           | 0.3125      | 0           |

**Supplemental Table 10: Extended Data 9**

**Fluoromyelin (area covered)**

**Animal 1**

**Animal 2**

**Animal 3**

**GFP**

0.157099464

0.055895848

0.031865962

**KD**

0.214621912

0.308789912

0.349963891

**GFP**

342.52

1.01

51.515

58.17954379

30.83825

82.90854379

**KD**

316.845

7.142

90.69126101

114.545587

51.491

130.2826305

**Max**

**Min**

**Median**

**Mean**

**Lower Quartile**

**Upper Quartile**

**Supplemental Table 11: Extended Data 10**

| <b>Pdgfra+,Olig2+/mm^2</b> | <b>Control</b> | <b>Piezo1</b> |
|----------------------------|----------------|---------------|
| <b>Animal 1</b>            | 231.4755061    | 465.4169934   |
| <b>Animal 2</b>            | 272.6782635    | 550.9310275   |
| <b>Animal 3</b>            | 206.5609921    | 397.2654443   |

  

| <b>CC1+,Olig2+/mm^2</b> | <b>Control</b> | <b>Piezo1</b> |
|-------------------------|----------------|---------------|
| <b>Animal 1</b>         | 231.4755061    | 465.4169934   |
| <b>Animal 2</b>         | 272.6782635    | 550.9310275   |
| <b>Animal 3</b>         | 206.5609921    | 397.2654443   |

## Supplemental Notes:

### *Models of demyelination-remyelination*

The ethidium bromide model is a well-established model of demyelination-remyelination in which low dose ethidium bromide (EtBr) is injected into the large white matter tracts of the caudal cerebellar peduncle (CCP). In this model, the peak of OPC recruitment occurs around day 7 after lesion induction, but thereafter there is delayed differentiation into Olig2+, CC1+ remyelinating oligodendrocytes in aged animals compared to young adult animals<sup>1</sup>. As such, all small molecules/enzymes throughout the text injected into the lesion were injected at day 7 so as to target the highest number of OPCs. An alternative model we have used is to inject lysolecithin into the spinal cord white matter of adult mice. As with the EtBr model, demyelination induced in this way follows a stereotypic temporal pattern of remyelination, with remyelination ongoing at 14 days after lesion-induction making this a suitable time point to examine interventions that alter the rate of remyelination.

### *Hydrogel substrate effects*

The loss of proliferation was surprising given that neonatal OPCs can proliferate on poly-D-lysine (PDL)-coated tissue culture plastic (Extended Data Fig. 1b-c). However, we observed that the long-term activity of neonatal OPCs on PDL-coated plastic was largely isolated to spheres that detached from the substrate, suggesting that PDL-coated plastic itself may not be sufficient for maintenance of OPC activity but relies on the instability of ECM attachment. The hydrogels on the other hand have covalently bound ECM, and are therefore more stable, and do not have floating spheres even after 12 days in culture. The stiffness-mediated activation of aged progenitor cells.

### *In vivo perturbation of actomyosin contractility*

To determine the effect of actin contractility on the stiffness of the CNS, we bathed freshly vibratomed aged CNS in 5 $\mu$ M of blebbistatin for 30 minutes. We found that blebbistatin treatment significantly softened the aged brain compared to brains treated with only DMSO (Extended Data Fig. 4f). As blebbistatin alone softened the aged CNS, we next wanted to test the role of actin contractility on the adult CNS *in vivo*. To do so, we first injected blebbistatin into un-lesioned forebrain of 14 month old female rats. In the homeostatic aged CNS, there are almost no cells proliferating 10 days following a control delivery of DMSO, while in the blebbistatin injected brain, a small but significant proportion of OPCs were labelled with EdU (Extended Data 4g-h). To determine the effect of blebbistatin following oligodendrocyte loss, we injected 5 $\mu$ M blebbistatin into areas of experimentally-induced demyelination to perturb OPC contractility (Extended Data 4i). We note that blebbistatin will affect all cells in the area of the lesion. At 14 days post-lesion, we observed more than 3 times the number of Olig2+/CC1+ differentiated oligodendrocytes in lesions treated with blebbistatin than in controls in each aged animal (N=3) (Extended Data 4j-k). Taken together with the *in vitro* data of blebbistatin-treated OPCs, these data suggest that inhibiting actomyosin contractility-mediated mechanotransduction has a positive effect on the activation and subsequent differentiation of aged OPCs.

### *Nuclear Lamina Changes*

Nuclear Lmna is mutated in Hutchinson Gilford Progeria Syndrome<sup>2</sup>, a disease in which aging is accelerated. Using qPCR, Western blot, and immunocytochemistry we found that the expressions of Lmna and Lamin A/C in OPCs progressively and significantly increase with OPC aging (Extended Data Fig. 5a-c). The changes are dramatic, with Lmna decreasing by 16-fold. We correspondingly found that aged OPCs on soft substrates had significantly lower levels of Lmna (Lamin A/C) compared to aged OPCs plated on stiff hydrogels (Extended Data 5d-g).

Our qPCR data showed an age-correlated increase in expression of *Lmna* as well as Lamin A/C. We subsequently knocked down *Lmna* of aged OPCs on stiff hydrogels, with negligible effects on aged progenitor cells (Extended Data 5h-k). However, mRNA overexpression of Lamin C, the dominant *Lmna* splice variant in OPCs, in neonatal OPCs on soft hydrogels led to a significant loss of neonate OPC activation (Extended Data 5l-p), suggesting that Lamin A/C plays a role in mediating mechanically induced aging in OPCs.

### *Piezo1 in multiple organisms*

Additional comment is warranted about Piezo1 and its expression in OPCs across multiple organisms. Here, we have shown that OPCs express Piezo1 in human and rat, along with mouse. Nevertheless, several sources have suggested that Piezo1 is not expressed in mouse OPCs. Using RNA-scope we found that Piezo1 is indeed widely expressed in Pdgfra<sup>+</sup> OPCs in both white and grey matter. Moreover, using new nuclear sequencing techniques, multiple groups have detected abundant Piezo1 mRNA in human gray and white matter. We believe that the discrepancy in these findings is the low number of OPCs and shallow sequencing depth captured in most whole brain murine single cell sequencing studies<sup>5,6</sup>, with many studies detecting far less than 1000 expressed genes in adult OPCs. In unpublished single-cell sequencing of our own, we have identified abundant Piezo1 mRNA in adult rodent OPCs. Our protein and qPCR analysis, along with newer studies with more sensitive adult single cell-sequencing studies of adult human cortex (Extended Data Fig. 6h) overwhelmingly confirm that Piezo1 is abundantly expressed in adult OPCs.

### *Cas9-Mediated Knock-in*

OPCs are primary cells that cannot grow clonally, are slowly dividing, do not readily undergo homologous recombination (data not shown), and have a small cytoplasm to nucleus ratio, making them hard to transfect; as such, common-use genetic and viral approaches are inefficient in OPCs. To overcome these limitations to efficiently perturb gene expression in OPCs, we generated a system using Cas9 mRNA, transcribed gRNAs, and HITI-mediated minicircle vectors to efficiently knock in a Piezo1 shRNA-GFP over expression cassette into the unused *Tubb3* locus (Extended Data Fig. 7a-e)<sup>7</sup>. gRNA-mediated knockdowns give rise to heterogeneous levels of the target-gene expression across a population of cells, whereas the shRNA-GFP provides for a characterizable monotonic knock-down across the pool of cells expressing the GFP.

### *In vivo CRISPR overview*

To knock-down Piezo1 in OPCs in the post-natal CNS, we developed two dual-AAV CRISPR systems. Using ribozymes, we were able to drive the expression of Piezo1 gRNA from cell-type specific promoters and efficiently knock-down Piezo1 levels in OPCs in both the neonatal and aged CNS. To efficiently target the CNS, we made use of the novel PHP-EB AAV serotype.

### *OPC-Specific Piezo1 protein knock-down*

In order to test the CRISPR constructs used to knock down Piezo1 in OPCs *in vivo*, we first confirmed that the constructs were able to knock down Piezo1 protein *in vitro*. To do so, we needed to use an *in vitro* cell line that would yield enough protein for a quantitative Western blot and would be easy to transfect. We found that acutely isolated OPCs from AAV-infected animals yielded insufficient material for quantitative protein analysis. Moreover, *in vitro* neonatal OPCs were inefficiently transfected with our large CRISPR constructs using lipid-based transfection methods. As such, we required an additional, easy-to-manipulate *in vitro* cell-type to model the capacity of our CRISPR constructs to reduce Piezo1 protein levels. Our *in vivo* CRISPR constructs are dependent on *Pdgfra* or *Cspg4* expression for gRNA transcription, so we required a specific cell-type that expressed both these genes along with *Piezo1* for the modelling of our *in vivo* CRISPR efficacy. Mouse Embryonic Fibroblasts (MEFs) express all three of these genes and are efficiently transfected by nucleofection, as we first showed by electroporation of a control GFP-overexpression cassette. Using MEFs, we electroporated our *in vivo* CRISPR constructs and found that our *in vivo* CRISPR systems efficiently reduced *Piezo1* protein levels in MEFs *in vitro* after 5 days. Together, these results confirm our *in vivo* DNA and RNA analysis that show that *Piezo1* is efficiently targeted and knocked-down with our *in vivo* CRISPR constructs.

1. Sim, F. J., Zhao, C., Penderis, J. & Franklin, R. J. M. The age-related decrease in CNS remyelination efficiency is attributable to an impairment of both oligodendrocyte progenitor recruitment and differentiation. *J. Neurosci.* **22**, 2451–2459 (2002).
2. Swift, J. *et al.* Nuclear Lamin-A Scales with Tissue Stiffness and Enhances Matrix-Directed Differentiation. *Science* **341**, 1240104–1240104 (2013).
3. Shimi, T. *et al.* The role of nuclear lamin B1 in cell proliferation and senescence. *Genes & Development* **25**, 2579–2593 (2011).
4. Shin, J.-W. *et al.* Lamins regulate cell trafficking and lineage maturation of adult human hematopoietic cells. *Proc. Natl. Acad. Sci. U.S.A.* **110**, 18892–18897 (2013).
5. Habib, N. *et al.* Massively parallel single-nucleus RNA-seq with DroNc-seq. *Nat. Methods* **14**, 955–958 (2017).
6. Zeisel, A. *et al.* Cell types in the mouse cortex and hippocampus revealed by single-cell RNA-seq. *Science* **347**, 1138–1142 (2015).
7. Suzuki, K. *et al.* In vivo genome editing via CRISPR/Cas9 mediated homology-independent targeted integration. *Nature* **540**, 144–149 (2016).
